# Supplementary material for: Therapeutic Effects of Batoclimab in Chinese Patients with Generalized Myasthenia Gravis: A Double-Blinded, Randomized, Placebo-Controlled Phase II Study
Source: PubMed Central journal article supplement — Neurol Ther. 2022 Apr 12;11(2):815–34. doi: 10.1007/s40120-022-00345-9 (PMC9095773; doi:10.1007/s40120-022-00345-9), 2022-04-12

# **Therapeutic Effects of Batoclimab in Chinese Patients with Generalized Myasthenia Gravis: A Double-Blinded, Randomized, Placebo-Controlled Phase II Study**

**Authors:** Chong Yan<sup>1,9\*</sup>; Rui-Sheng Duan<sup>2\*</sup>; Huan Yang<sup>3\*</sup>; Haifeng Li<sup>4</sup>; Zhangyu Zou<sup>5</sup>; Hua Zhang<sup>6</sup>; Hongyu Zhou<sup>7</sup>; Xiao-Li Li<sup>2</sup>; Hao Zhou<sup>3</sup>; Lidong Jiao<sup>4</sup>; Jialin Chen<sup>5</sup>; Jian Yin<sup>6</sup>; Qin Du<sup>7</sup>; Michael Lee<sup>8</sup>; Yu Chen<sup>8</sup>; Xiaoxiang Chen<sup>8</sup>; Chongbo Zhao<sup>1,9</sup>;

1. Huashan Rare Disease Center, Department of Neurology, Huashan Hospital, Fudan University, Shanghai, China;

2. Department of Neurology, The First Affiliated Hospital of Shandong First Medical University & Shandong Provincial Qianfoshan Hospital, Jinan, China;

3. Department of Neurology, Xiangya Hospital, Central South University, Changsha, China;

4. Department of Neurology, Xuanwu Hospital, Capital Medical University, Beijing, China;

5. Department of Neurology, Fujian Medical University Union Hospital, Fuzhou, China;

6. Department of Neurology, Beijing Hospital, Beijing, China;

7. Department of Neurology, West China Hospital, Sichuan University, Chengdu, China;

8. Harbour BioMed, Shanghai, China;

9. National Center for Neurological Disorders, Shanghai, China.

\* These authors contribute equally to the present studies.

**Correspondence:** Chongbo Zhao, Department of Neurology, Huashan Hospital, Fudan University, Shanghai, China

**E-mail:** zhao\_chongbo@fudan.edu.cn

## Supplemental Materials

### Supplemental Table 1 The dose of corticosteroids at baseline

| Dose of corticosteroids at base line<br>(Prednisone or equivalent) | Batoclimab<br>680 mg<br>(N=11) | Batoclimab<br>340 mg<br>(N=10) | Placebo<br>(N=9) |
|--------------------------------------------------------------------|--------------------------------|--------------------------------|------------------|
| 0 - ≤10 mg                                                         | 2                              | 2                              | 2                |
| 10 - ≤20 mg                                                        | 4                              | 1                              | 1                |
| 20 - ≤40 mg                                                        | 2                              | 3                              | 4                |
| 40 - ≤60 mg                                                        | 3                              | 0                              | 0                |
| Total                                                              | 11                             | 6                              | 9                |

### Supplemental Table 2 The dose of immunosuppressants at baseline

| Immunosuppressants  | Dose    | Batoclimab<br>680 mg<br>(N=11) | Batoclimab<br>340 mg<br>(N=10) | Placebo<br>(N=9) |
|---------------------|---------|--------------------------------|--------------------------------|------------------|
| <b>Azathioprine</b> | 12.5 mg | 0                              | 0                              | 1                |
|                     | 50 mg   | 1                              | 0                              | 0                |
|                     | 100 mg  | 0                              | 1                              | 0                |
|                     | 150 mg  | 0                              | 1                              | 0                |
| <b>Tacrolimus</b>   | 1 mg    | 0                              | 0                              | 1                |
|                     | 2 mg    | 0                              | 2                              | 0                |
|                     | 3 mg    | 5                              | 3                              | 0                |
|                     | 4 mg    | 2                              | 1                              | 0                |
|                     | 6 mg    | 0                              | 0                              | 1                |
| <b>Total</b>        |         | 8                              | 8                              | 3                |

**Supplemental Table 3 Thymectomy information at baseline**

| <b>Groups</b>     | <b>Subject number</b> | <b>Thymectomy</b> | <b>ICF signature</b> | <b>Interval</b> |
|-------------------|-----------------------|-------------------|----------------------|-----------------|
| <b>Batoclimab</b> | XXX                   | 2011-03-09        | 2020-11-19           | >9 yrs.         |
| <b>680mg</b>      | XXX                   | 2012-10           | 2021-02-24           | >8 yrs.         |
|                   | XXX                   | 2014-01-24        | 2021-01-06           | 7 yrs.          |
| <b>Batoclimab</b> | XXX                   | 2018-11-14        | 2020-08-13           | 1 yrs.&9 months |
| <b>340mg</b>      | XXX                   | 2012-10           | 2021-03-24           | >8 yrs.         |
|                   | XXX                   | 2000-08           | 2021-03-16           | >20 yrs.        |
| <b>Placebo</b>    | XXX                   | 2016-06           | 2021-03-05           | >4 yrs.         |
|                   | XXX                   | 2004              | 2021-03-17           | >16 yrs.        |

**Supplemental Table 4 Ethics committee information**

| <b>Study Site</b>                                                  | <b>Ethics Committee</b>                                                                                                        | <b>Approval Number</b> |
|--------------------------------------------------------------------|--------------------------------------------------------------------------------------------------------------------------------|------------------------|
| Huashan Hospital, Fudan University                                 | Institutional Ethics Committee for Drugs Clinical Trials of Huashan Hospital, Fudan University                                 | 2020-074               |
| The First Affiliated Hospital of Shandong First Medical University | Institutional Ethics Committee for Drugs Clinical Trials of The First Affiliated Hospital of Shandong First Medical University | 2020-10                |
| Xiangya Hospital, Central South University                         | Institutional Ethics Committee of Xiangya Hospital, Central South University                                                   | 202009223              |
| Xuanwu Hospital, Capital Medical University                        | Institutional Ethics Committee for Drugs Clinical Trials of Xuanwu Hospital, Capital Medical University                        | 2020-018               |
| Fujian Medical University Union Hospital                           | Institutional Ethics Committee for Drugs Clinical Trials of Fujian Medical University Union Hospital                           | 2020YW054-01           |
| Beijing Hospital                                                   | Institutional Ethics Committee of Beijing Hospital                                                                             | 2020BJYYEC-212-01      |
| West China Hospital, Sichuan University                            | Institutional Ethics Committee for Drugs Clinical Trials of West China Hospital, Sichuan University                            | 2020-156               |

## Supplemental figure legends

### Supplemental Figure 1 Changes of IgM levels

Serum total IgM levels after batoclimab and placebo treatment over the whole study period. Values are mean±standard error, expressed as the concentrations change from baseline.

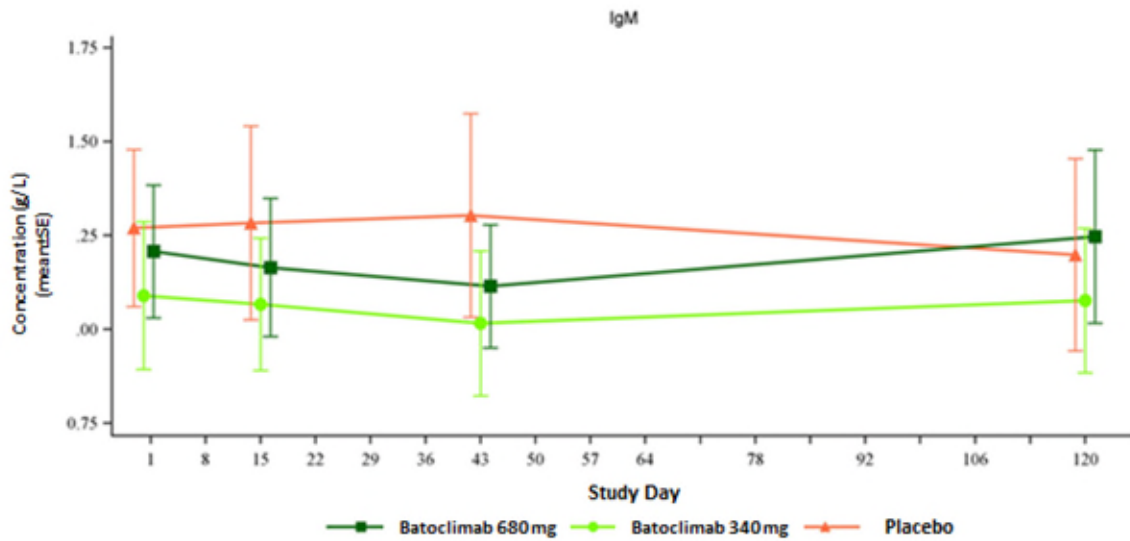

Supplement: 40120_2022_345_MOESM1_ESM.pdf [file 40120_2022_345_MOESM1_ESM.pdf]
